# Supplementary material
Source: Springer Nature journal article supplement (https://www.springermedizin.de/resource/supplementary/12936_2012_2751_MOESM4_ESM.pdf/9544152)
Supplement: MOESM4 [file 9544152]

### Additional File 4 : Study Design

| Authors              | Year  | Country                                                          | Randomization | Duration of Follow Up (days) | Parasitemia Inclusion Criteria / $\mu$ L | Parasitemia ( $\mu$ L) | Age Inclusion Criteria | Age (Year) |
|----------------------|-------|------------------------------------------------------------------|---------------|------------------------------|------------------------------------------|------------------------|------------------------|------------|
| 4ABC Study Group     | 2011  | Burkina Faso; Gabon; Nigeria; Rwanda; Uganda; Zambia; Mozambique | Yes           | 28                           | 2000-200000                              | 30000*                 | 6-59 months            | 2.5        |
| Abacassamo et al.    | 2004  | Mozambique                                                       | Yes           | 21                           | 2000-100000                              | 23685*                 | 0.5-5 years            | 2.5        |
| Abdulla et al.       | 2008  | Benin, Kenya, Mali, Mozambique, and Tanzania                     | Yes           | 42                           | 2000-200000                              | 26364*                 | $\leq$ 12 years        | 3*         |
| Achan et al.         | 2009  | Uganda                                                           | Yes           | 28                           | Any Parasitemia                          | 16124                  | 0.5-5 years            | 2          |
| Adam et al.          | 2006  | Sudan                                                            | No            | 28                           | NA                                       | 21342                  | All ages               | 18         |
| Adam et al.          | 2005a | Sudan                                                            | Yes           | 28                           | NA                                       | 18257                  | All ages               | 15         |
| Adam et al.          | 2005b | Sudan                                                            | Yes           | 28                           | NA                                       | 15529                  | All ages               | 16         |
| Adjei et al.         | 2008  | Ghana                                                            | Yes           | 28                           | 2000-200000                              | 51408                  | 0.5-14 years           | 5          |
| Adjuik et al.        | 2002  | Kenya, Senegal, and Gabon                                        | Yes           | 28                           | 1000-200000                              | 26231                  | 0.5-10 years           | 5.5        |
| Agomo et al.         | 2008  | Nigeria                                                          | No            | 28                           | 1000-250000                              | 6890                   | Adult and children     | 22.5       |
| Alecrim et al.       | 2006  | Brazil                                                           | Yes           | 6                            | 1000-50000                               | NA                     | $\geq$ 16 years        | 35         |
| Allen et al.         | 2009  | Mozambique                                                       | Yes           | 42                           | up to 500000                             | 2885                   | $>$ 1 years            | 12*        |
| Asante et al.        | 2009  | Ghana                                                            | Yes           | 28                           | Any Parasitemia                          | NA                     | $>$ 14 years           | 38.1       |
| Ashley et al.        | 2004  | Thailand                                                         | Yes           | 63                           | NA                                       | 9535                   | 1-65 years             | 21*        |
| Ashley et al.        | 2005  | Thailand                                                         | Yes           | 63                           | $\leq$ 4%                                | 10678                  | 1-65 years             | 19*        |
| Ashley et al.        | 2006  | Thailand                                                         | Yes           | 63                           | NA                                       | 8612                   | 0.5-65 years           | 20*        |
| Ashley et al.        | 2007  | Thailand                                                         | Yes           | 42                           | $\geq$ 80                                | 1981                   | 18-65 years            | 30*        |
| Asih et al.          | 2009  | Indonesia                                                        | Single arm    | 28                           | $>$ 500                                  | 6300*                  | All ages               | 29*        |
| Assefa et al.        | 2010  | Ethiopia                                                         | Single arm    | 28                           | 1000-100000                              | 22660                  | All ages               | 9          |
| Avila et al.         | 2004  | Bolivia                                                          | Yes           | 28                           | $>$ 250                                  | 4445                   | All ages               | 28.4       |
| Ayede et al.         | 2010  | Nigeria                                                          | Yes           | 28                           | 2000-200000                              | 11673*                 | 12-156 months          | 5.1        |
| Barenes et al.       | 2004  | Burkina Faso                                                     | Yes           | 28                           | $>$ 1000                                 | 4390                   | 1-15 years             | 6.6        |
| Bassat et al.        | 2009  | Burkina Faso, Kenya, Mozambique, Uganda and Zambia               | Yes           | 42                           | 2000-200000                              | 25884                  | 0.5-5 years            | 2.43       |
| Bell et al.          | 2008  | Malawi                                                           | Yes           | 42                           | 2000-200000                              | 36315                  | 12-59 months           | 4*         |
| Bell et al.          | 2009  | Malawi                                                           | Yes           | 42                           | NA                                       | 21262                  | $\geq$ 0.5 years       | 8.9        |
| Bethell et al.       | 2011  | Cambodia                                                         | Yes           | 42                           | 1000-200000                              | 18266                  | 18-65 years            | 22*        |
| Blair et al.         | 2006  | Colombia                                                         | Yes           | 28                           | 250-50000                                | NA                     | $>$ 1 years            | NA         |
| Bonnet et al.        | 2007  | Guinea                                                           | Yes           | 28                           | 2000-200000                              | 34716                  | 6-59 months            | 2.4        |
| Bonnet et al.        | 2009  | The Democratic Republic of Congo                                 | Yes           | 28                           | 2000-200000                              | 26134                  | 6-59 months            | 1.8*       |
| Borrmann et al.      | 2005  | Gabon                                                            | No            | 28                           | 1000-100000                              | 34560*                 | 6-12 years             | 10.3*      |
| Borrmann et al.      | 2011  | Kenya                                                            | Yes           | 63                           | 2000-200000                              | 35600*                 | 6-59 months            | 2.3*       |
| Bousema et al.       | 2006  | Kenya                                                            | Yes           | 28                           | $\geq$ 500                               | 11887                  | 0.5-10 years           | 4.1*       |
| Bouyou-Akotet et al. | 2010  | Gabon                                                            | Yes           | 28                           | 1000-250000                              | 36400*                 | 1-13 years             | 9          |
| Bukirwa et al.       | 2006  | Uganda                                                           | Yes           | 28                           | 2000-200000                              | 22071                  | 1-10 years             | 1.83*      |
| Campbell et al.      | 2006  | India                                                            | Yes           | 42                           | 150-100000                               | 5157                   | $\geq$ 1 years         | 17*        |
| Chanda et al.        | 2006  | Zambia                                                           | Single arm    | 28                           | 2000-200000                              | NA                     | $<$ 60 months          | 1.9        |
| Charle et al.        | 2009  | Equatorial Guinea                                                | Yes           | 14                           | 2000-200000                              | 24978*                 | 6-59 months            | 2.2        |
| de Oliveira et al.   | 2011  | Peru                                                             | Yes           | 28                           | 250-100000                               | 3551                   | $\geq$ 1 years         | 22.5*      |
| de Vries et al.      | 2000  | Vietnam                                                          | Yes           | 28                           | 1000-100000                              | 16123                  | 8-65 years             | 26*        |
| Denis et al.         | 2002  | Cambodia                                                         | Single arm    | 28                           | $>$ 1000                                 | NA                     | 1-60 years             | NA         |
| Denis et al.         | 2006a | Cambodia                                                         | Single arm    | 28                           | 1000-150000                              | NA                     | $>$ 6 years            | NA         |
| Denis et al.         | 2006b | Cambodia                                                         | No            | 28                           | 1000-150000                              | 16000                  | $>$ 6 years            | 24         |
| Depoortere et al.    | 2005  | Zambia                                                           | Yes           | 28                           | 2000-100000                              | 19185                  | 6-59 months            | 1.8        |
| Diem Thuy et al.     | 2007  | Vietnam                                                          | Yes           | 42                           | 1000-200000                              | NA                     | $\geq$ 15 years        | 28         |
| Djimdé et al.        | 2008  | Mali                                                             | Yes           | 28                           | 2000-200000                              | 15760                  | $\geq$ 0.5 years       | 3*         |
| Dondorp et al.       | 2009  | Cambodia and Thailand                                            | Yes           | 63                           | $\geq$ 10000                             | 37214                  | $\geq$ 16 years        | 31         |
| Dunyo et al.         | 2011  | The Gambia                                                       | Yes           | 28                           | 500-200000                               | 21670                  | 6-120 months           | 5          |
| Durrani et al.       | 2005  | Afghanistan                                                      | Yes           | 42                           | $>$ 1 parasite/HPF                       | 6137                   | $\geq$ 3 years         | 15.3       |
| Elamin et al.        | 2010  | Sudan                                                            | Single arm    | 28                           | NA                                       | 28712                  | All ages               | 13         |
| Falade et al.        | 2005  | Kenya, Nigeria, Tanzania                                         | Single arm    | 28                           | 1000-100000                              | 18488*                 | Children               | 2*         |
| Falade et al.        | 2008a | Nigeria                                                          | Yes           | 28                           | 2000-200000                              | 27822                  | 6-120 months           | 4.5        |
| Falade et al.        | 2008b | Nigeria                                                          | Single arm    | 28                           | 1000-100000                              | 26364                  | Children               | 3          |
| Fanello et al.       | 2007  | Rwanda                                                           | Yes           | 28                           | 2000-200000                              | 23324                  | 12-59 months           | 2.8        |
| Fanello et al.       | 2008  | Rwanda                                                           | Yes           | 28                           | 2000-200000                              | 22566                  | 6-59 months            | 2.4        |

### Additional File 4 : Study Design

| Authors            | Year  | Country                           | Randomization | Duration of Follow Up (days) | Parasitemia Inclusion Criteria / $\mu$ L | Parasitemia ( $\mu$ L) | Age Inclusion Criteria    | Age (Year) |
|--------------------|-------|-----------------------------------|---------------|------------------------------|------------------------------------------|------------------------|---------------------------|------------|
| Faucher et al.     | 2009  | Benin                             | Yes           | 42                           | >1000                                    | 49718                  | 6-60 months               | 2.2        |
| Faye et al.        | 2007  | Senegal                           | Yes           | 28                           | NA                                       | 27000                  | All ages                  | 15         |
| Faye et al.        | 2010a | Senegal                           | Yes           | 28                           | 1000-100000                              | 31677                  | Children (10-20 kg)       | 5          |
| Faye et al.        | 2010b | Senegal and Ivory Coast           | Yes           | 28                           | 1000-200000                              | 30817                  | >7 years                  | 18         |
| Fehintola et al.   | 2008  | Nigeria                           | Yes           | 28                           | $\geq$ 2000                              | 105426                 | 0.5-10 years              | 6          |
| Fehintola et al.   | 2010  | Nigeria                           | Yes           | 14                           | $\geq$ 2000                              | 16596                  | 0.5-12 years              | 6.1        |
| Gbotosho et al.    | 2011a | Nigeria                           | Yes           | 42                           | >2000                                    | 64145                  | $\leq$ 15 years           | 7.1        |
| Gbotosho et al.    | 2011b | Nigeria                           | Yes           | 42                           | 2000                                     | 71794                  | $\leq$ 12 years           | 7.2        |
| Giao et al.        | 2001  | Vietnam                           | Yes           | 28                           | 1000-100000                              | 12589                  | >6 years                  | 25*        |
| Giao et al.        | 2004  | Vietnam                           | Yes           | 28                           | $\geq$ 1000                              | 19392                  | >16 years                 | 27*        |
| Gil et al.         | 2003  | Sao Tome and Principe             | Yes           | 28                           | 10000-100000                             | 36579                  | 6-59 months               | 2.3        |
| Gomez et al.       | 2003  | Ecuador                           | Yes           | 28                           | 500-10000                                | 2838                   | 1-12 years                | 6.7        |
| Grande et al.      | 2007  | Peru                              | Yes           | 63                           | 1000-200000                              | 5866                   | 5-60 years                | NA         |
| Grandesso et al.   | 2006  | Sierra Leone                      | Single arm    | 28                           | NA                                       | 27116                  | 6-59 months               | 1.4*       |
| Guthmann et al.    | 2005  | Angola                            | No            | 28                           | 2000-100000                              | 19460                  | 6-59 months               | 2.5        |
| Gutman et al.      | 2009  | Peru                              | Yes           | 56                           | 250-50000                                | NA                     | 18 years                  | 36         |
| Hamour et al.      | 2005  | Sudan                             | Yes           | 28                           | 2000-200000                              | 22757                  | 6-59 months               | 2.5        |
| Haque et al.       | 2007  | Bangladesh                        | Single arm    | 42                           | NA                                       | NA                     | $\geq$ 18 years           | 22*        |
| Hasugian et al.    | 2007  | Indonesia                         | Yes           | 42                           | <4%                                      | 5514                   | $\geq$ 1 years            | 17*        |
| Hatz et al.        | 2008  | Europe and Colombia               | Single arm    | 28                           | NA                                       | NA                     | $\geq$ 18 years           | 38         |
| Hien et al.        | 2004  | Vietnam                           | Yes           | 56                           | NA                                       | 7789                   | >2 years                  | 26         |
| Hombhanje et al.   | 2009  | Papua New Guinea                  | Yes           | 28                           | $\geq$ 250                               | 22228                  | $\geq$ 14 years           | 27.5*      |
| Hung et al.        | 2004  | Vietnam                           | Yes           | 28                           | 1000-200000                              | 10100                  | $\geq$ 6 years            | 27         |
| Huong et al.       | 2001  | Vietnam                           | Yes           | 28                           | >1000                                    | 18200                  | 4-65 years                | 26.2       |
| Hutagalung et al.  | 2005  | Thailand                          | Yes           | 42                           | NA                                       | 8047                   | All ages                  | 23         |
| Hwang et al.       | 2011  | Ethiopia                          | Single arm    | 42                           | 1000-100000                              | 16374                  | >0.5 years                | 16.7       |
| Ibrahim et al.     | 2007  | Sudan                             | No            | 28                           | NA                                       | 24050                  | All ages                  | 13         |
| Janssens et al.    | 2007  | Cambodia                          | Yes           | 63                           | <175000                                  | 4786                   | >1 year                   | 21*        |
| Juma et al.        | 2008  | Kenya                             | Yes           | 28                           | 2000-200000                              | 34881                  | 6-59 months               | 2.1*       |
| Kabanywany et al.  | 2007  | Tanzania                          | Yes           | 28                           | 2000-200000                              | 49348                  | 6-59 years                | 2          |
| Kanya et al.       | 2007  | Uganda                            | Yes           | 42                           | 2000-200000                              | 22789                  | 0.5-10 years              | 1.5*       |
| Karema et al.      | 2006  | Rwanda                            | Yes           | 28                           | 2000-200000                              | 29999                  | 12-59 months              | 3          |
| Karunajeewa et al. | 2003  | Papua New Guinea                  | No            | NA                           | <2000                                    | 536*                   | 5-10 years                | 7.9        |
| Karunajeewa et al. | 2008a | Papua New Guinea                  | Yes           | 42                           | >1000                                    | 20400                  | 5-10 years                | 6.9        |
| Karunajeewa et al. | 2008b | Papua New Guinea                  | Yes           | 42                           | >1000                                    | 50986*                 | 6-60 months               | 2.9        |
| Kayentao et al.    | 2009  | Mali                              | Yes           | 28                           | 2000-200000                              | 24113                  | 6-59 months               | 2.8        |
| Kobbe et al.       | 2008  | Ghana                             | Yes           | 28                           | 2000-200000                              | 38864                  | 6-59 months               | 2.7        |
| Kofoed et al.      | 2003  | Guinea-Bissau                     | Yes           | 35                           | $\geq$ 800                               | 19200*                 | Children                  | 5.2*       |
| Koram et al.       | 2005  | Ghana                             | Yes           | 28                           | 2000-200000                              | 19687                  | 6-59 months               | 2.1*       |
| Koram et al.       | 2008  | Ghana                             | Single arm    | 28                           | 2000-200000                              | 35793                  | 6-59 months               | 2.2*       |
| Krudsood et al.    | 2000  | Thailand                          | Yes           | 28                           | NA                                       | NA                     | $\geq$ 14 years           | 25.7       |
| Krudsood et al.    | 2002  | Thailand                          | Yes           | 28                           | 100-400000                               | NA                     | Adult and children >25 kg | NA         |
| Krudsood et al.    | 2003  | Thailand                          | Yes           | 28                           | NA                                       | NA                     | >14 years                 | 28.3       |
| Krudsood et al.    | 2007  | Thailand                          | Yes           | 28                           | NA                                       | 8247                   | $\geq$ 13 years           | NA         |
| Kshirsagar et al.  | 2000  | India                             | Yes           | 28                           | 1000-200000                              | 4343*                  | $\geq$ 16 years           | 29*        |
| Lefevre et al.     | 2001  | Thailand                          | Yes           | 28                           | NA                                       | 2063                   | $\geq$ 12 years           | 25*        |
| Marquino et al.    | 2003  | Peru                              | Yes           | 28                           | 500-30000                                | 6840                   | 5-50 years                | 25.9       |
| Marquino et al.    | 2005  | Peru                              | Yes           | 28                           | 500-50000                                | 7309                   | $\geq$ 5 years            | 28         |
| Martensson et al.  | 2005  | Tanzania                          | Yes           | 42                           | 2000-200000                              | 19731                  | 6-59 months               | 2.0*       |
| Massougbdji et al. | 2002  | Benin, Cameroon, Ivory Coast      | Yes           | 28                           | >2000                                    | NA                     | Adult and children >30 kg | 19.5       |
| Mayxay et al.      | 2004  | The Lao PDR                       | Yes           | 42                           | 5000-200000                              | 25026                  | $\geq$ 1 year             | 15.4       |
| Mayxay et al.      | 2006  | The Lao PDR                       | Yes           | 42                           | 1000-200000                              | 18505                  | $\geq$ 1 years            | 16         |
| Menan et al.       | 2011  | Cameroon, Ivory Coast and Senegal | Yes           | 28                           | 1000-200000                              | 13225*                 | $\geq$ 2 years            | 15.51      |
| Ménard et al.      | 2007  | Madagascar                        | Yes           | 28                           | 1000-200000                              | 22905                  | 0.5-15 years              | 4          |
| Ménard et al.      | 2008  | Madagascar                        | Yes           | 28                           | 1000-200000                              | 14346                  | 0.5-15 years              | 5*         |
| Mens et al.        | 2008  | Kenya                             | Yes           | 28                           | 1000-200000                              | 12145                  | 6-144 months              | 5*         |
| Meremikwu et al.   | 2006  | Nigeria                           | Yes           | 14                           | 1000-200000                              | 7972                   | 6-59 months               | 2.4        |

### Additional File 4 : Study Design

| Authors                 | Year  | Country                                       | Randomization | Duration of Follow Up (days) | Parasitemia Inclusion Criteria / $\mu$ L | Parasitemia ( $\mu$ L) | Age Inclusion Criteria                       | Age (Year) |
|-------------------------|-------|-----------------------------------------------|---------------|------------------------------|------------------------------------------|------------------------|----------------------------------------------|------------|
| Michael et al.          | 2010  | Nigeria                                       | Yes           | 42                           | >2000                                    | 78195                  | 1-11 years                                   | 6.3        |
| Mockenhaupt et al.      | 2005  | Ghana                                         | Yes           | 28                           | 2000-200000                              | 35619                  | 6-59 months                                  | 2.1*       |
| Mohamed et al.          | 2006  | Sudan                                         | No            | 28                           | 1760-51600                               | 10215                  | All ages                                     | 23         |
| Mukhtar et al.          | 2007  | Sudan                                         | Yes           | 28                           | NA                                       | NA                     | All ages                                     | 18         |
| Mulenga et al.          | 2006  | Zambia                                        | Yes           | 45                           | 1000                                     | 8405                   | 15-50 years                                  | 26         |
| Mutabingwa et al.       | 2005  | Tanzania                                      | Yes           | 28                           | $\geq$ 2000                              | 18920*                 | 4-59 months                                  | 1.8*       |
| Na-Bangchang et al.     | 2010  | Thailand                                      | Single arm    | 42                           | 1000-100000                              | 5232*                  | >15 years                                    | 25*        |
| Nahum et al.            | 2007  | Benin                                         | Yes           | 28                           | 1000-200000                              | 20286                  | 6-59 months                                  | 3.1        |
| Nambei et al.           | 2005  | Central Republic of Africa                    | Yes           | 14                           | >600                                     | 2700                   | 18-32 years                                  | 25         |
| Nambozi et al.          | 2011  | Zambia                                        | Yes           | 42                           | 2000-200000                              | 35840*                 | 6-59 months                                  | 2.4        |
| Ndayiragije et al.      | 2004  | Burundi                                       | No            | 14                           | NA                                       | 22400                  | <60 months                                   | 3.1        |
| Ndiaye et al.           | 2008  | Senegal and Cameroon                          | Yes           | 14                           | 1000-200000                              | 13750*                 | Any adults or children weighing $\geq$ 10 kg | NA         |
| Ndiaye et al.           | 2009  | Cameroon, Madagascar, Mali and Senegal        | Yes           | 28                           | 1000-200000                              | 41863                  | All ages ( $\geq$ 10 kg)                     | 9.1        |
| Ngasala et al.          | 2011a | Tanzania                                      | Single arm    | 42                           | NA                                       | 19054                  | 3-59 months                                  | 2.6*       |
| Ngasala et al.          | 2011b | Tanzania                                      | Yes           | 56                           | 2000-200000                              | 38272                  | <60 months                                   | 2.8        |
| Nguyen et al.           | 2003  | Vietnam                                       | Yes           | 28                           | >1000                                    | 4480                   | 4-65 years                                   | 10.3       |
| Noedl et al.            | 2006  | Thailand                                      | Yes           | 28                           | 1000-100000                              | 6761                   | 20-65 years                                  | 29         |
| Noedl et al.            | 2010  | Cambodia                                      | Yes           | 28                           | 100-100000                               | 4227                   | 18-65 years                                  | 29         |
| Obonyo et al.           | 2003  | Kenya                                         | Yes           | 28                           | $\geq$ 4000                              | 19858                  | <5years                                      | 1.5        |
| Oduro et al.            | 2004  | Ghana                                         | Yes           | 14                           | $\geq$ 5 parasites/HPF                   | 28200                  | $\geq$ 15 years                              | 28.5       |
| Oduro et al.            | 2008  | Ghana                                         | Yes           | 28                           | 2000-200000                              | 12456                  | 6-120 months                                 | 3.7        |
| Orosio et al.           | 2007  | Colombia                                      | Yes           | 28                           | 250-50000                                | 4416                   | 1-65 years                                   | 18.5*      |
| Owusu-Agyei et al.      | 2008  | Ghana                                         | Yes           | 28                           | 2000-200000                              | 16521                  | <120 months                                  | 3.1        |
| Oyakhireme et al.       | 2007  | Gabon                                         | No            | 28                           | NA                                       | 7500*                  | Children                                     | 1.3        |
| Penali et al.           | 2008  | Ivory Coast                                   | Yes           | 28                           | 1000-200000                              | 20112                  | $\geq$ 6 years                               | 10         |
| Piola et al.            | 2005  | Uganda                                        | Yes           | 28                           | 500-100000                               | NA                     | All ages                                     | NA         |
| Premji et al.           | 2009  | Burkina Faso, Ghana, Kenya, Nigeria, Tanzania | Yes           | 42                           | 2000-200000                              | 22383                  | $\geq$ 1-<15 years                           | 4          |
| Priotto et al.          | 2003  | Uganda                                        | Yes           | 28                           | 500-100000                               | 21373                  | 6-59 months                                  | 2.4        |
| Pukrittayakamee et al.  | 2004  | Thailand                                      | Yes           | 28                           | NA                                       | 26566                  | Adult                                        | 24         |
| Rahman et al.           | 2008  | Bangladesh                                    | Yes           | 42                           | NA                                       | 7019                   | $\geq$ 2 years                               | 20         |
| Ramharter et al.        | 2005  | Gabon                                         | Yes           | 28                           | 1000-100000                              | 12000*                 | 3-12 years                                   | 7          |
| Rasheed et al.          | 2011  | Liberia                                       | Single arm    | 28                           | NA                                       | NA                     | >0.5 years                                   | 21.76      |
| Ratcliff et al.         | 2007  | Indonesia                                     | Yes           | 42                           | <4%                                      | 3386                   | NA                                           | 17*        |
| Rojanawatsirivej et al. | 2003  | Thailand                                      | No            | 28                           | NA                                       | 5578                   | Adult                                        | 33.03      |
| Rulisa et al.           | 2007  | Rwanda                                        | Yes           | 28                           | NA                                       | 33182                  | 3-144 months                                 | 5.1        |
| Rwagacondo et al.       | 2003  | Rwanda                                        | Yes           | 28                           | 1000-100000                              | 12667                  | 6-59 months                                  | 2.1        |
| Rwagacondo et al.       | 2004  | Rwanda                                        | Yes           | 28                           | 1000-100000                              | 20522                  | 6-59 months                                  | 2.2        |
| Sagara et al.           | 2006  | Mali                                          | Yes           | 28                           | 1000-100000                              | 13143                  | $\geq$ 0.5 years                             | 12         |
| Sagara et al.           | 2008  | Mali                                          | Yes           | 28                           | 2000-200000                              | 18357                  | $\geq$ 1 year                                | 7          |
| Sagara et al.           | 2009  | Cameroon, Mali, Rwanda and Sudan              | Yes           | 28                           | 2000-200000                              | 8400*                  | > 0.5 years                                  | 8*         |
| Schwarz et al.          | 2005  | Gabon                                         | Single arm    | 28                           | NA                                       | 11600*                 | Children                                     | 0.6        |
| Silachamroon et al.     | 2005  | Thailand                                      | Yes           | 28                           | NA                                       | 9883                   | $\geq$ 15 years                              | 27         |
| Sirima et al.           | 2003  | Burkina Faso                                  | Yes           | 28                           | 1000-100000                              | 21600*                 | 0.5-5 years                                  | 1.2        |
| Sirima et al.           | 2009  | Burkina Faso                                  | Yes           | 28                           | >1000                                    | NA                     | 6-59 months                                  | 2.3        |
| Sirivichayakul et al.   | 2007  | Thailand                                      | Yes           | 28                           | 500-150000                               | 27114                  | 1-14 years                                   | 8.3        |
| Smithuis et al.         | 2006  | Myanmar                                       | Yes           | 42                           | 500-100000                               | 8128                   | $\geq$ 1 years                               | NA         |
| Smithuis et al.         | 2010  | Myanmar                                       | Yes           | 63                           | 500-200000                               | 7849                   | >0.5 years                                   | NA         |
| Smithuis et al.         | 2004a | Myanmar                                       | Yes           | 42                           | 500-100000                               | 6026                   | $\geq$ 1 years                               | NA         |
| Smithuis et al.         | 2004b | Myanmar                                       | Yes           | 42                           | 1000-250000                              | 11609                  | All ages                                     | 16.7       |
| Song et al.             | 2011  | Cambodia                                      | Yes           | 28                           | 1000-100000                              | 26637                  | 7-65 years                                   | 25.2       |
| Sowunmi et al.          | 2005  | Nigeria                                       | Yes           | 28                           | >2000                                    | 32173                  | $\leq$ 12 years                              | 6.7        |
| Sowunmi et al.          | 2009  | Nigeria                                       | Yes           | 42                           | >2000                                    | 30654                  | $\leq$ 120 months                            | 6.2        |
| Sowunmi et al.          | 2011  | Nigeria                                       | Yes           | 42                           | 2000                                     | 64165                  | $\leq$ 12 years                              | 7.5        |
| Sowunmi et al.          | 2007a | Nigeria                                       | Yes           | 35                           | >2000                                    | 47627                  | <11 years                                    | 5.9        |

### Additional File 4 : Study Design

| Authors               | Year  | Country                               | Randomization | Duration of Follow Up (days) | Parasitemia Inclusion Criteria / $\mu$ L | Parasitemia ( $\mu$ L) | Age Inclusion Criteria   | Age (Year) |
|-----------------------|-------|---------------------------------------|---------------|------------------------------|------------------------------------------|------------------------|--------------------------|------------|
| Sowunmi et al.        | 2007b | Nigeria                               | Yes           | 42                           | >2000                                    | 46541                  | $\leq$ 120 months        | 5.5        |
| Staedke et al.        | 2004  | Uganda                                | Yes           | 28                           | 500-200000                               | 22483                  | 0.5-10 years             | 4*         |
| Stohrer et al.        | 2004  | The Lao PDR                           | Yes           | 42                           | 1000-100000                              | 6400                   | All ages                 | 9*         |
| Suputtamongkol et al. | 2003  | Thailand                              | Yes           | 42                           | NA                                       | NA                     | All ages                 | NA         |
| Sutherland et al.     | 2003  | The Gambia                            | Yes           | 28                           | >500                                     | NA                     | 1-9 years                | 4.9        |
| Sutherland et al.     | 2005  | The Gambia                            | Yes           | 28                           | 500-250000                               | 56689                  | 1-10 years               | 4          |
| Swarthout et al.      | 2006  | The Democratic Republic of Congo      | Yes           | 28                           | 2000-200000                              | 27392                  | 6-59 months              | 2          |
| Sykes et al.          | 2009  | Tanzania                              | Yes           | 42                           | 2000-200000                              | 20960*                 | 6-59 months              | 2.5*       |
| Tall et al.           | 2007  | The Comoros Union                     | Yes           | 14                           | 1000-200000                              | 4788                   | 2-70 years               | 6*         |
| Tangpukdee et al.     | 2005  | Thailand                              | Yes           | 28                           | NA                                       | 4645                   | >14 years                | 26.5       |
| Tangpukdee et al.     | 2008  | Thailand                              | Yes           | 28                           | NA                                       | 12585                  | $\geq$ 15 years          | 22*        |
| Thanh et al.          | 2009  | Vietnam                               | Yes           | 42                           | 200-200000                               | 14074                  | 5-60 years               | 23.5       |
| Thapa et al.          | 2007  | Nepal                                 | Yes           | 28                           | >500                                     | 6492*                  | >5 years                 | 26         |
| Thriemer et al.       | 2010  | Bangladesh                            | Yes           | 42                           | 100-100000                               | 9781                   | 8-65 years               | 22         |
| Thwing et al.         | 2009  | Kenya                                 | Single arm    | 28                           | 2000-200000                              | 54915                  | 6-59 months              | 2.6        |
| Tietche et al.        | 2010  | Cameroon                              | Single arm    | 63                           | 1000-250000                              | 20040*                 | Children (10-20 kg)      | 3          |
| Tiono et al.          | 2009  | Burkina Faso, Ghana, Mali, Nigeria    | Yes           | 28                           | 2000-200000                              | 21640                  | $\geq$ 1 years           | 7.4        |
| Tjitra et al.         | 2001  | Indonesia                             | Yes           | 28                           | 1000-100000                              | 1960                   | $\geq$ 0.5 years         | 9.5        |
| Toure et al.          | 2009  | Ivory Coast                           | Yes           | 28                           | 2000-200000                              | 10186                  | $\geq$ 6 months          | NA         |
| Toure et al.          | 2011  | Ivory coast                           | Yes           | 28                           | 2000-200000                              | 19685                  | 6-59 months              | NA         |
| Trung et al.          | 2009  | Vietnam                               | Yes           | 28                           | 1000-100000                              | 20428*                 | 7-65 years               | 25.8*      |
| Tshefu et al.         | 2010  | The Democratic Republic of Congo; The | Yes           | 42                           | 1000-100000                              | 14813                  | 3-60 years               | 18         |
| Tun et al.            | 2009  | Myanmar                               | Single arm    | 28                           | 1000-100000                              | 17556                  | 15-55 years              | 27         |
| Ursing et al.         | 2011  | Guinea-Bissau                         | Yes           | 42                           | 800-200000                               | 22346*                 | 6-180 months             | 6.5*       |
| Valecha et al.        | 2009  | India                                 | Single arm    | 28                           | 1000-100000                              | 7653                   | Adult and children >5 kg | 11.1       |
| Valecha et al.        | 2010a | Thailand, India, and Tanzania         | Yes           | 28                           | 1000-100000                              | NA                     | 13-65 years              | 26.4       |
| Valecha et al.        | 2010b | Thailand, The Lao PDR and India       | Yes           | 63                           | 80-200000                                | 7924                   | 0.25-65 years            | 25.4       |
| van den Broek et al.  | 2006  | The Democratic Republic of Congo      | Yes           | 28                           | 2000-200000                              | 24997                  | 6-59 months              | 1.9        |
| van den Broek et al.  | 2005a | Sudan                                 | Yes           | 42                           | 2000-200000                              | 24835                  | 6-59 months              | 2.8        |
| van den Broek et al.  | 2005b | Bangladesh                            | Yes           | 42                           | 1000-100000                              | 11814                  | $\geq$ 1 years           | 15.7       |
| van Vugt et al.       | 2000  | Thailand                              | Yes           | 28                           | $\geq$ 500                               | NA                     | All ages                 | NA         |
| van Vugt et al.       | 2002  | Thailand                              | Yes           | 42                           | NA                                       | 4211                   | Adult and children       | 22.3       |
| Vasquez et al.        | 2009  | Colombia                              | Yes           | 42                           | 150-50000                                | 3280*                  | >1 years                 | NA         |
| von Seidlein et al.   | 2000  | The Gambia                            | Yes           | 28                           | $\geq$ 500                               | 19000*                 | 0.5-10 years             | 4.83       |
| von Seidlein et al.   | 2001  | The Gambia                            | Yes           | 28                           | >500                                     | 9080                   | <18 years                | 6.6        |
| Wang et al.           | 2001  | Equatorial Guinea                     | Single arm    | 28                           | NA                                       | 15217                  | Adult and children       | 25.5       |
| Warsame et al.        | 2009  | Somalia                               | No            | 28                           | 2000-200000                              | NA                     | 6-120 months             | NA         |
| Wattanakoon et al.    | 2003  | Thailand                              | Single arm    | 42                           | NA                                       | NA                     | Adult                    | NA         |
| Weerasinghe et al.    | 2002  | Sri Lanka                             | Single arm    | 28                           | NA                                       | NA                     | >15 years                | NA         |
| Whegang et al.        | 2010  | Cameroon                              | Yes           | 28                           | >2000                                    | 40170                  | <60 months               | 2.4        |
| Wong et al.           | 2003  | Malaysia                              | Yes           | 35                           | 200-100000                               | 7798                   | 16-61 years              | 38         |
| Wootton et al.        | 2008  | Malawi and The Gambia                 | Yes           | 14                           | 10000-100000                             | NA                     | 1-60 years               | NA         |
| Yavo et al.           | 2011  | Cameroon, Ivory Coast and Senegal     | Yes           | 28                           | 1000-200000                              | 10840*                 | $\geq$ 2 years           | 15.64      |
| Yeka et al.           | 2005  | Uganda                                | Yes           | 28                           | 2000-200000                              | NA                     | $\geq$ 6 months          | 3.5*       |
| Yeka et al.           | 2008  | Uganda                                | Yes           | 42                           | 2000-200000                              | 35211                  | 0.5-10 years             | 2*         |
| Zongo et al.          | 2007a | Burkina Faso                          | Yes           | 28                           | NA                                       | 27689                  | $\geq$ 0.5 years         | 4*         |
| Zongo et al.          | 2007b | Burkina Faso                          | Yes           | 42                           | 2000-200000                              | 27110                  | $\geq$ 0.5 years         | 4*         |
| Zougrana et al.       | 2008  | Burkina Faso                          | Yes           | 28                           | $\geq$ 1000                              | 31000*                 | 6-10 years               | 7*         |
